# Supplementary material for: The story of a summit nucleus: hillslope boulders and their effect on erosional patterns and landscape morphology in the Chilean Coastal Cordillera
Source: Copernicus journal article supplement (doi:10.5194/esurf-11-305-2023), 2023-04-18
Supplement: Supplementary file 1 [file esurf-11-305-2023-supplement.pdf]

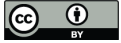

*Supplement of*

**The story of a summit nucleus: hillslope boulders and their effect on erosional patterns and landscape morphology in the Chilean Coastal Cordillera**

**Emma Lodes et al.**

*Correspondence to:* Emma Lodes (lodes@gfz-potsdam.de)

The copyright of individual parts of the supplement might differ from the article licence.

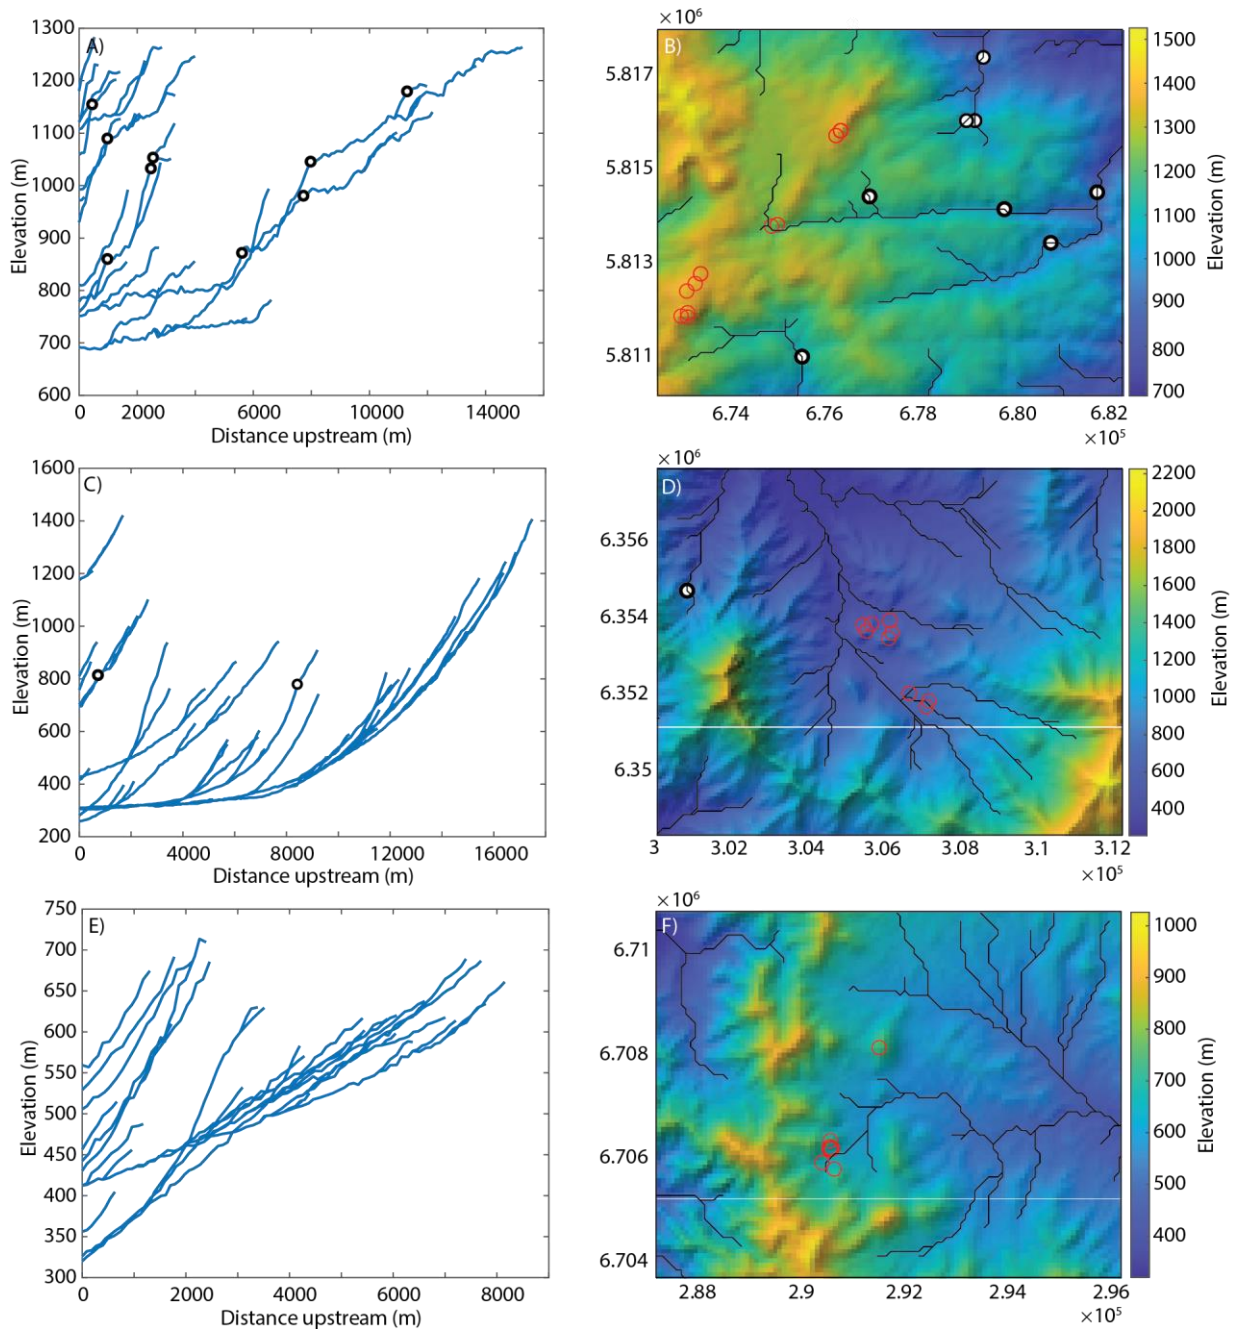

Figure S1. Knickpoints from all three catchments. Knickpoints (white circles) were identified with TopoToolbox's knickpoint finder function, using an elevation threshold of 30 m; streams are plotted with a minimum upstream area of  $10^6$  m<sup>2</sup>. A) Stream profiles and knickpoints from NA; B) map of NA showing knickpoints in white and all samples plotted in red; C) stream profiles and knickpoints from LC; D) map of LC showing samples in red and knickpoints in white; E) stream profiles from SG with no knickpoints; F) map of SG showing samples in red and no knickpoints.
